# Supplementary material for: Developing a Fluorescent Inducible System for Free Fucose Quantification in Escherichia coli
Source: MDPI journal article supplement (doi:10.3390/bios13030388), 2023-03-15
Supplement: s1 [file s1]

# Developing a Molecular Biosensor of Free Fucose in *Escherichia coli*.

Samantha Nuñez, María Barra and Daniel Garrido \*

Department of Chemical and Bioprocess Engineering, School of Engineering, Pontificia Universidad Católica de Chile, Vicuña Mackenna, 4860, Santiago, Chile.

\* Correspondence: dgarridoc@ing.puc.cl.

**Table S1.** Linear regression of the calibration curves obtained for 0 mM to 3 mM with a resolution of 0.4 mM at different incubation times.

| Hour | Equation            | R-squared     |
|------|---------------------|---------------|
| 15   | $Y = 1459X + 640,8$ | 0,9682        |
| 15,5 | $Y = 1517X + 674,9$ | <b>0,9684</b> |
| 16   | $Y = 1574X + 727,1$ | 0,967         |
| 16,5 | $Y = 1619X + 792,6$ | 0,9648        |
| 17   | $Y = 1675X + 827,4$ | 0,9643        |
| 17,5 | $Y = 1732X + 872,5$ | 0,9636        |
| 18   | $Y = 1779X + 915,2$ | 0,9624        |
| 18,5 | $Y = 1826X + 959,9$ | 0,9616        |
| 19   | $Y = 1877X + 1010$  | 0,9606        |
| 19,5 | $Y = 1931X + 1045$  | 0,9596        |
| 20   | $Y = 1981X + 1086$  | 0,9588        |

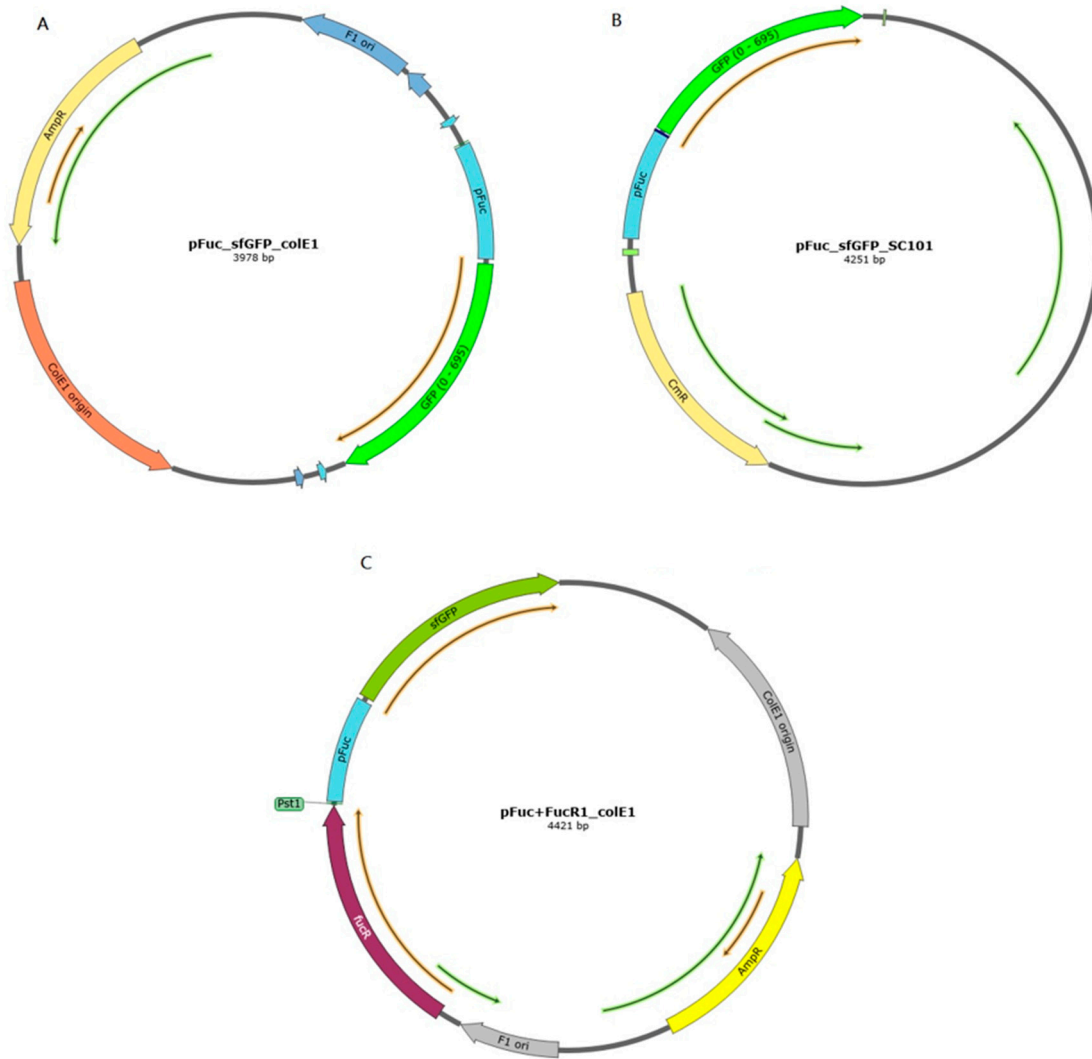

**Figure S1.** Representation of the plasmids used in this study. A: pFUC\_sfGFP\_colE1 is a high copy plasmid containing the fucose promoter controlling GFP expression and an ampicillin resistance gene; B: pFUC\_sfGFP\_SC101 is a low copy plasmid containing the fucose promoter controlling GFP expression and a chloramphenicol resistance gene; C: pFUC+FucR1\_colE1 is a high copy plasmid containing the fucose promoter controlling GFP expression, in addition to a cloned FucR encoding gene and an ampicillin resistance gene. Internal arrows correspond to transcription units. .

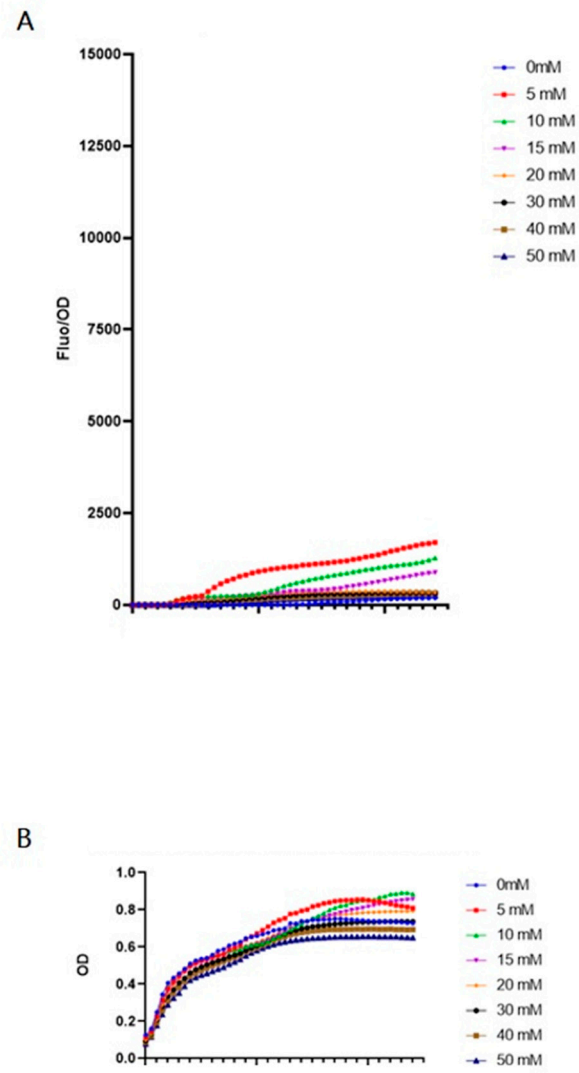

**Figure S2.** Specificity tests of *E. coli* BL21 containing pFuc\_FucR\_colE1, using sfGFP as a reporter, for rhamnose. A: F/OD values in the presence of increasing concentrations of rhamnose; B: growth curves (OD values) of this strain in the presence of increasing concentrations of rhamnose. Kinetics and growth curves were performed in triplicates and are presented as average  $\pm$  SD.
